# Supplementary material
Source: Royal Society of Chemistry journal article supplement (doi:10.1039/d6tc01192f)
Supplement: d6tc01192f1.pdf [file d6tc01192f1.pdf]

## Supplementary Information

# Copper Sulfide Based Self-powered Photoelectrochemical Detectors for Optical Communication in Seawater

Qiang Huang<sup>a,\*</sup>, Changgeng Du<sup>b</sup>, ShenChun Yuan<sup>a</sup>, Ge Xu<sup>a</sup>, Ding Wang<sup>a</sup>, Wenyi Ji<sup>a</sup>, Wenqiong Cao<sup>a</sup>,  
Fei Qi<sup>a,\*</sup>, Yayun Pu<sup>a</sup>, Nan Zhang<sup>a</sup>, Xiaosheng Tang<sup>a</sup>

<sup>a</sup> School of Integrated Circuits, Chongqing University of Posts and Telecommunications, Chongqing 400065, China.

<sup>b</sup> School of Electronic Science and Engineering, Chongqing University of Posts and Telecommunications, Chongqing 400065, China.

\* Corresponding authors.

Corresponding authors' email addresses: qhuang1986@163.com (Qiang Huang),  
qifei@cqupt.edu.cn (Fei Qi)

## Supplementary Figures

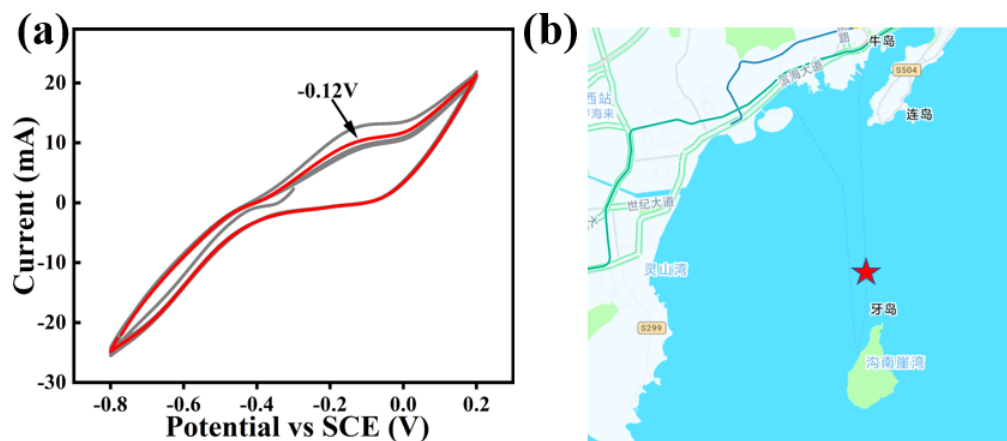

Fig. S1. (a) CV plot for CuS film deposition, (b) sampling sites of seawater.

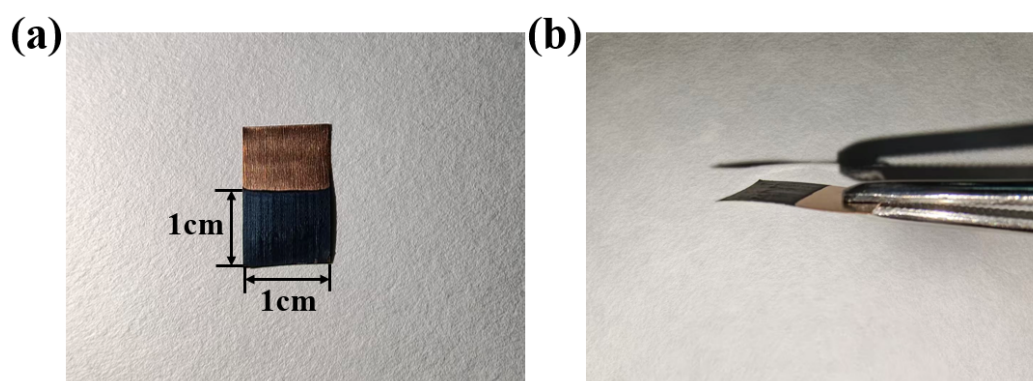

Fig. S2 (a) Front and (b) side view photographs of the CuS PEC detector.

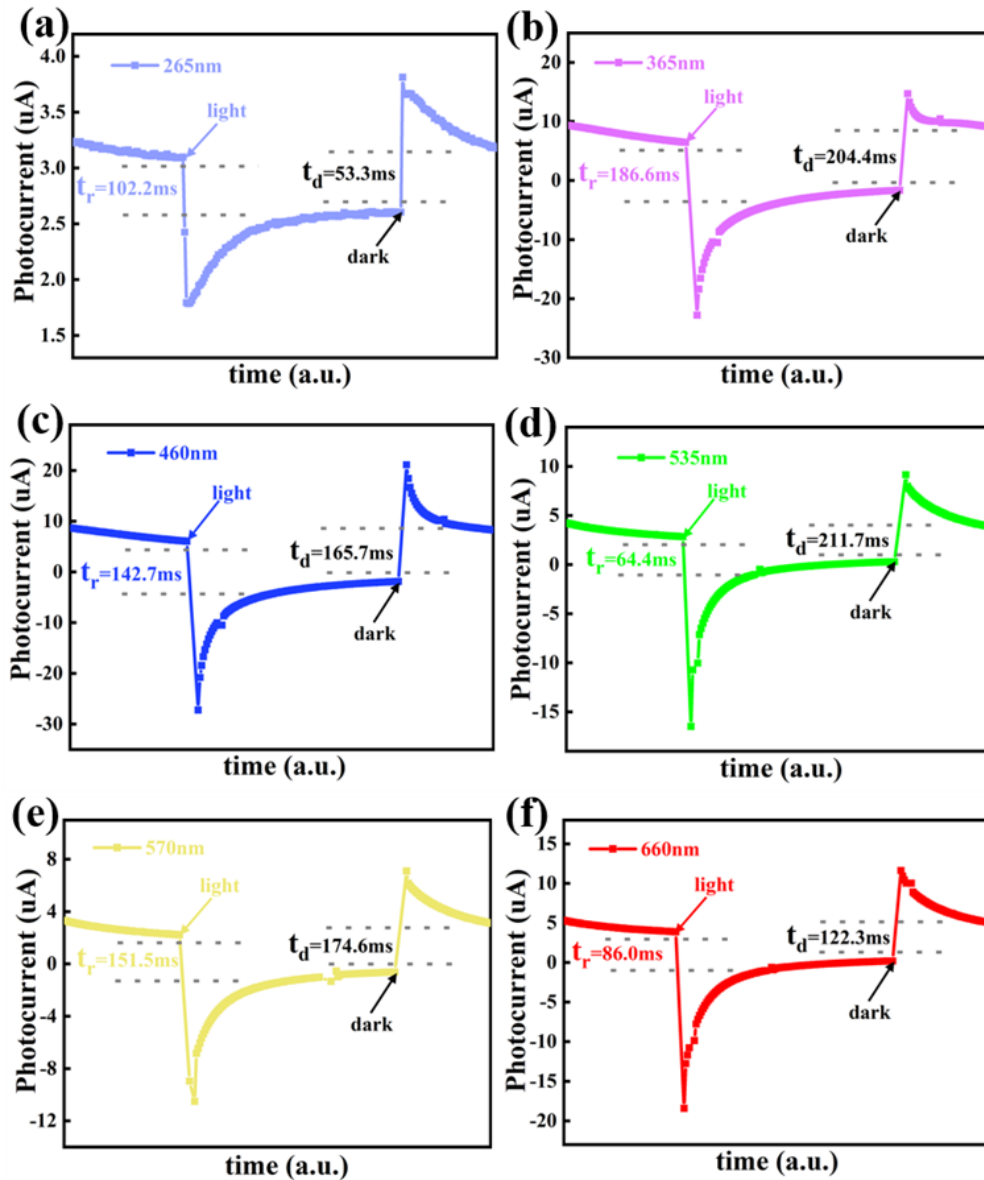

Fig. S3 Response time of the CuS PEC detector under illumination at wavelengths of (a) 265 nm, (b)

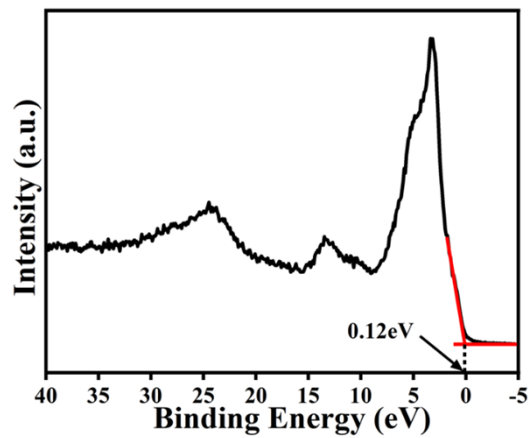

365 nm, (c) 460 nm, (d) 535 nm, (e) 570 nm, and (f) 660 nm.

Fig. S4 XPS valence band spectrum of CuS.

## Supplementary Tables

Table S1 Performance comparison of PEC detectors based on transition metal chalcogenides

| Materials               | Electrolyte                            | Responsivity ( $\mu\text{A/W}$ ) | Response Time (ms) | Reference |
|-------------------------|----------------------------------------|----------------------------------|--------------------|-----------|
| CuO                     | 0.1 M $\text{Na}_2\text{SO}_4$ , -0.4V | 2700                             | 60/400             | [1]       |
| SnS                     | 0.5 M $\text{Na}_2\text{SO}_4$ , 0.6V  | 59.8                             | 200/400            | [2]       |
| $\text{Bi}_2\text{S}_3$ | 1.0 M KOH, 0.6 V                       | 210                              | 100/100            | [3]       |
| PbS                     | 0.05 M KOH, 0.4 V                      | 28810                            | 160/160            | [4]       |
| GeSe                    | 0.5 M KOH, 0.3V                        | 76.3                             | 200/200            | [5]       |
| GeTe                    | 0.3 M $\text{Na}_2\text{SO}_4$ , 0.6V  | 228.9                            | 690/880            | [6]       |
| CuS                     | Seawater, 0V                           | 2730                             | 119/142            | this work |

Table S2 Performance comparison of PEC detectors in seawater and simulated seawater environments

| Materials       | Electrolyte                  | Responsivity ( $\mu\text{A/W}$ ) | Response Time (ms) | Reference |
|-----------------|------------------------------|----------------------------------|--------------------|-----------|
| $\text{SnSe}_2$ | Seawater, 0V                 | 505.74                           | 45/20              | [7]       |
| $\text{SnSe}_2$ | Seawater, 0.4V               | 10342                            | 90/180             | [7]       |
| ZnO             | Seawater, 0V                 | 2040                             | 120.7/127          | [8]       |
| CuSe            | simulated seawater,<br>0V    | 408.7                            | <200               | [9]       |
| CuSe            | simulated seawater,<br>-0.3V | 9500                             | 20/17              | [9]       |
| InSe            | simulated seawater,<br>0V    | 800                              | 28/300             | [10]      |
| CuS             | Seawater, 0V                 | 2730                             | 119/142            | this work |

Table S3 Performance comparison of self-powered PEC detectors

| Materials                        | Electrolyte                    | Responsivity ( $\mu\text{A}/\text{W}$ ) | Response Time (ms) | Reference |
|----------------------------------|--------------------------------|-----------------------------------------|--------------------|-----------|
| ZnO                              | 0.1 M $\text{Na}_2\text{SO}_4$ | 379.9                                   | 152/151            | [11]      |
| $\text{SnSe}_2$                  | 0.5 M $\text{Na}_2\text{SO}_4$ | 1.359                                   | 400/800            | [12]      |
| $\text{Bi}_2\text{S}_3$          | 0.1 M KOH                      | 8.9                                     | 100/100            | [2]       |
| $\text{TaSe}_2$                  | 0.5 M KOH                      | 208                                     | 300/700            | [13]      |
| $\text{In}_2\text{Se}_3$         | 0.4 M KOH                      | 1880                                    | 1/2                | [14]      |
| $\alpha\text{-Ga}_2\text{O}_3$   | 0.5 M $\text{Na}_2\text{SO}_4$ | 3870                                    | 230/150            | [15]      |
| $\text{Bi}_2\text{O}_2\text{Se}$ | 1.0 M KOH                      | 260                                     | 100/140            | [16]      |
| CuS                              | Seawater, 0V                   | 2730                                    | 119/142            | this work |

Table S4 Stability comparison of PEC detectors

| Materials                | Stability test methods                                         | Performance Retention (%) | Reference |
|--------------------------|----------------------------------------------------------------|---------------------------|-----------|
| $\text{In}_2\text{Se}_3$ | 100 cycles, 0V, 365nm, Seawater                                | 95.8                      | [14]      |
| $\text{SnSe}_2$          | 105 cycles, 0V, 405nm, Seawater                                | negligible change         | [7]       |
| ZnO                      | 100 cycles, 0V, 365nm, Seawater                                | 92.9                      | [8]       |
| CuSe                     | 400 cycles, -0.3V, 455nm, simulated seawater                   | 78                        | [9]       |
| InSe                     | vacuum storage tank, 10 months, 0V, 525 nm, simulated seawater | 80                        | [10]      |
| $\text{Bi}_2\text{S}_3$  | ambient air storage, 1 month, 0V, simulated light, 0.1 M KOH   | 85.4                      | [3]       |
| CuS                      | ambient air storage, 3 month, 0V, 420nm, Seawater              | 89.4                      | this work |
| CuS                      | 300 cycles, 0V, 420nm, Seawater                                | 81.1                      | this work |

## References

- [1] Gao Q, Jin Z, Qu L, et al. CuO Nanosheets for Use in Photoelectrochemical Photodetectors[J]. *ACS Applied Nano Materials*, 2023, 6(1): 784-791.
- [2] Huang W, Xie Z, Fan T, et al. Black-phosphorus-analogue tin monosulfide: an emerging optoelectronic two-dimensional material for high-performance photodetection with improved stability under ambient/harsh conditions[J]. *Journal of Materials Chemistry C*, 2018, 6(36): 9582-9593.
- [3] Huang W, Xing C, Wang Y, et al. Facile fabrication and characterization of two-dimensional bismuth(III) sulfide nanosheets for high-performance photodetector applications under ambient conditions[J]. *Nanoscale*, 2018, 10(5): 2404-2412.
- [4] Gao L, Chen H, Wang R, et al. Ultra-small 2D PbS nanoplatelets: liquid-phase exfoliation and emerging applications for photo-electrochemical photodetectors[J]. *Small*, 2021, 17(5): 14.
- [5] Ma D, Zhao J, Wang R, et al. Ultrathin GeSe nanosheets: from systematic synthesis to studies of carrier dynamics and applications for a high-performance UV-Vis photodetector[J]. *ACS Applied Materials & Interfaces*, 2019, 11(4): 4278-4287.
- [6] Wang H, Lu C, Dong W, et al. Photoelectrochemical photodetector based on germanium telluride film synthesized by physical vapor deposition[J]. *ACS Applied Nano Materials*, 2024, 7(8): 9616-9625.
- [7] Vyas P D, Dhorada D, Bhanderi K, et al. Seawater-powered PEC photodetectors based on a layered metal dichalcogenide for marine underwater optical communication[J]. *ACS Sustainable Chemistry & Engineering*, 2025, 13(30): 12010-12021.
- [8] Ren S, Fu K, Lv Y, et al. Under-seawater immersion of vertically-aligned ZnO dual-band UV photodetector for high-fidelity wireless optical communication[J]. *Journal of Alloys and Compounds*, 2026, 1050: 9.
- [9] Yao Y, Shao Z, Zhou J, et al. Two-dimensional CuSe nanosheet array for high-performance photoelectrochemical photodetector using simulated seawater as electrolyte[J]. *Materials Science in Semiconductor Processing*, 2024, 178: 6.
- [10] Xu Y, Zhou J, Tian D, et al. Photoelectrochemical-type photodetectors based on ball milling InSe for underwater optoelectronic devices[J]. *Nanomaterials*, 2025, 15(1): 9.
- [11] Cheng Y, Zhang L, Zhai R, et al. Enhancing the performance of photoelectrochemical photodetector based on ZnO films by adjusting interfacial barrier[J]. *Journal of Materials Science*, 2025, 60(45): 22776-22785.
- [12] Patel M, Bhakhar S, Solanki G K. Showcasing a self-powered photoelectrochemical photodetector with ultrasonically exfoliated SnSe<sub>2</sub> nanosheets[J]. *Journal of Materials Science: Materials in Electronics*, 2024, 35(8): 10.
- [13] Chauhan P, Patel A B, Solanki G K, et al. Flexible self-powered electrochemical photodetector functionalized by multilayered tantalum diselenide nanocrystals[J]. *Advanced Optical Materials*, 2021, 9(22): 10.
- [14] Xue R, Shao Z, Yang X, et al. Self-powered photoelectrochemical photodetectors based on electrochemically exfoliated In<sub>2</sub>Se<sub>3</sub> nanosheets[J]. *ACS Applied Nano Materials*, 2022, 5(5): 7036-7041.

- [15] Zhang B, Wu H, Feng C, et al. Self-powered solar-blind photodetectors based on  $\alpha$ -Ga<sub>2</sub>O<sub>3</sub> nanorod arrays[J]. ACS Applied Nano Materials, 2022, 5(8): 11956-11963.
- [16] Li J, Wu M, Zhang H, et al. Flexible self-powered photoelectrochemical photodetectors based on cellulose-based hydrogel electrolytes and Bi<sub>2</sub>O<sub>2</sub>Se nanosheets[J]. ACS Applied Nano Materials, 2024, 7(1): 594-605.
